# Supplementary material for: Immunogenomic analyses associate immunological alterations with mismatch repair defects in prostate cancer
Source: JCI journal article supplement (doi:10.1172/jci121924), 2018-09-03
Supplement: sd2 [file 2]

301 Moved Permanently

# Moved Permanently

The document has moved here.
