# Supplementary material for: Immunogenomic analyses associate immunological alterations with mismatch repair defects in prostate cancer
Source: JCI journal article supplement (doi:10.1172/jci121924), 2018-09-03
Supplement: sd2 [file 2]

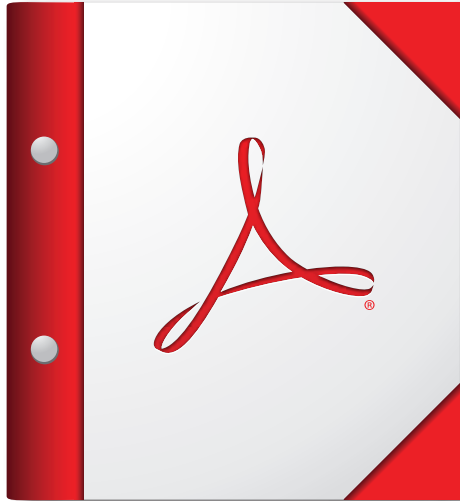

**For the best experience, open this PDF portfolio in  
Acrobat X or Adobe Reader X, or later.**

[Get Adobe Reader Now!](#)
